# Supplementary material for: An amino functionalized zirconium metal organic framework as a catalyst for oxidative desulfurization
Source: Royal Society of Chemistry journal article supplement (doi:10.1039/d2nj01375d), 2022-01-01
Supplement: d2nj01375d1.pdf [file d2nj01375d1.pdf]

**Electronic Supplementary Material (ESI) for New Journal of Chemistry.**

*Supporting information for:*

**Amino functionalized zirconium metal organic framework as  
catalyst for oxidative desulfurization**

Juan Li <sup>a, b</sup>, Mingyuan Zhu <sup>a, b, \*</sup>, and Bin Dai <sup>a</sup>

*<sup>a</sup> School of Chemistry and Chemical Engineering of Shihezi University, Shihezi, Xinjiang  
832000, (P. R. China)*

*<sup>b</sup> College of Chemistry & Chemical Engineering Yantai University, Yantai, Shandong  
264010 (P. R. China)*

*Tel.: +86 9932057270; Fax: +86 9932057210;*

*E-mail: zhuminyuan@shzu.edu.cn (Mingyuan Zhu);*

## Content

|                 |   |
|-----------------|---|
| 1. Table.....   | 3 |
| TableS1.....    | 3 |
| TableS2.....    | 4 |
| 2. Figures..... | 5 |
| FigureS1.....   | 5 |
| FigureS2.....   | 5 |
| FigureS3.....   | 5 |
| FigureS4.....   | 6 |

## 1. Table

**Table S1 EDS analysis of different elements content of UiO-66-NH<sub>2</sub>**

| Element         | Weight% | Atomic% |
|-----------------|---------|---------|
| C               | 3.45    | 15.55   |
| N               | 0.05    | 0.18    |
| O               | 0.88    | 2.99    |
| Cl              | 0.04    | 0.06    |
| Zr              | 1.04    | 0.62    |
| Cu <sup>a</sup> | 94.54   | 80.60   |
| Total           | 100.00  | 100.00  |

<sup>a</sup> The EDS analysis select copper mesh for sample preparation.

**Table S2 Textural properties of different samples.**

| Samples                           | $S_{\text{BET}}^{\text{a}}$<br>( $\text{m}^2\text{g}^{-1}$ ) | $V_{\text{Pore}}^{\text{b}}$<br>( $\text{cm}^3\text{g}^{-1}$ ) | $D_{\text{pore}}^{\text{c}}$<br>(nm) |
|-----------------------------------|--------------------------------------------------------------|----------------------------------------------------------------|--------------------------------------|
| UiO-66                            | 832.13                                                       | 0.16                                                           | 2.16                                 |
| UiO-66-NH <sub>2</sub>            | 716.78                                                       | 0.29                                                           | 2.26                                 |
| UiO-66-NH <sub>2</sub> recycled 7 | 363.61                                                       | 0.14                                                           | 2.87                                 |

<sup>a</sup> BET surface area.

<sup>b</sup> BJH Adsorption cumulative volume of pores.

<sup>c</sup> Adsorption average pore diameter.

## 2. Figures

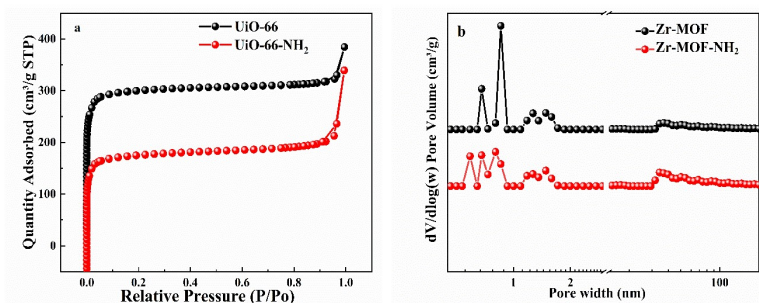

**Fig. S1** N<sub>2</sub> sorption isotherms (a) and Pore size distribution (b) of UiO-66 and UiO-66-NH<sub>2</sub>.

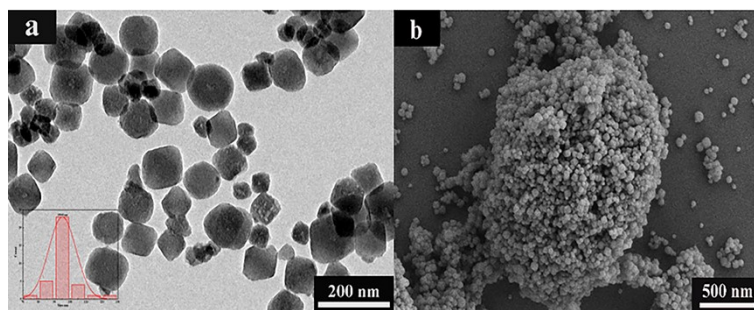

**Fig. S2.** TEM (a) and SEM (b) images of UiO-66-NH<sub>2</sub> recycled 7.

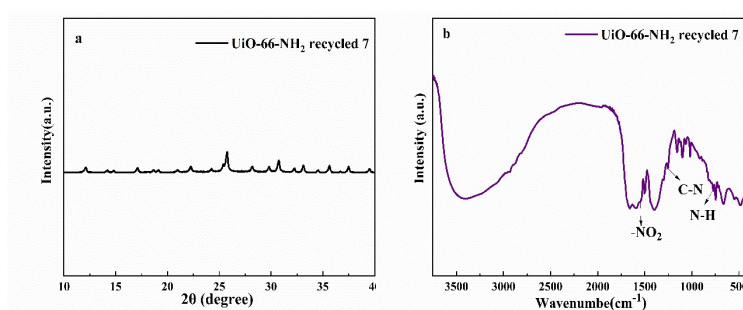

**Fig. S3** XRD pattern (a) and FTIR spectra (b) of UiO-66-NH<sub>2</sub> recycled.

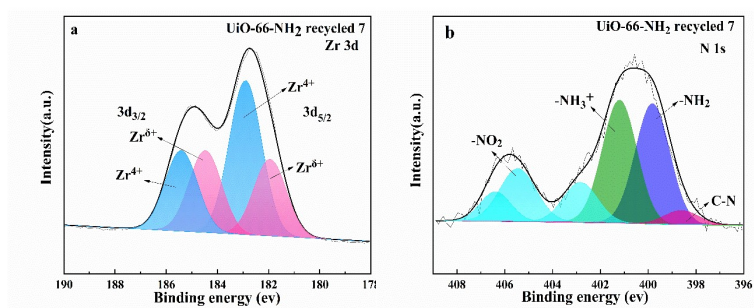

**Fig. S4 XPS spectra of UiO-66-NH<sub>2</sub> recycled 7.**
